# Supplementary material for: New 8-Hydroxybriaranes from the Gorgonian Coral Junceella fragilis (Ellisellidae)
Source: Mar Drugs. 2019 Sep 14;17(9):534. doi: 10.3390/md17090534 (PMC6780648; doi:10.3390/md17090534)
Supplement: Supplementary file 1 [file marinedrugs-17-00534-s001.pdf]

## Supporting Information

| No.  | Content                                                                             | Page |
|------|-------------------------------------------------------------------------------------|------|
| S1.  | ESIMS spectrum of compound <b>1</b> .                                               | 2    |
| S2.  | HRESIMS spectrum of compound <b>1</b> .                                             | 2    |
| S3.  | IR spectrum of compound <b>1</b> .                                                  | 3    |
| S4.  | $^1\text{H}$ NMR spectrum (600 MHz) of compound <b>1</b> in $\text{CDCl}_3$ .       | 3    |
| S5.  | $^{13}\text{C}$ NMR spectrum (150 MHz) of compound <b>1</b> in $\text{CDCl}_3$ .    | 4    |
| S6.  | HSQC spectrum of compound <b>1</b> in $\text{CDCl}_3$ .                             | 4    |
| S7.  | $^1\text{H}$ – $^1\text{H}$ COSY spectrum of compound <b>1</b> in $\text{CDCl}_3$ . | 5    |
| S8.  | HMBC spectrum of compound <b>1</b> in $\text{CDCl}_3$ .                             | 5    |
| S9.  | NOESY spectrum of compound <b>1</b> in $\text{CDCl}_3$ .                            | 6    |
| S10. | ESIMS spectrum of compound <b>2</b> .                                               | 6    |
| S11. | HRESIMS spectrum of compound <b>2</b> .                                             | 7    |
| S12. | IR spectrum of compound <b>2</b> .                                                  | 7    |
| S13. | $^1\text{H}$ NMR spectrum (600 MHz) of compound <b>2</b> in $\text{CDCl}_3$ .       | 8    |
| S14. | $^{13}\text{C}$ NMR spectrum (150 MHz) of compound <b>2</b> in $\text{CDCl}_3$ .    | 9    |
| S15. | HSQC spectrum of compound <b>2</b> in $\text{CDCl}_3$ .                             | 10   |
| S16. | $^1\text{H}$ – $^1\text{H}$ COSY spectrum of compound <b>2</b> in $\text{CDCl}_3$ . | 10   |
| S17. | HMBC spectrum of compound <b>2</b> in $\text{CDCl}_3$ .                             | 11   |
| S18. | NOESY spectrum of compound <b>2</b> in $\text{CDCl}_3$ .                            | 11   |
| S19. | ESIMS spectrum of compound <b>3</b> .                                               | 12   |
| S20. | HRESIMS spectrum of compound <b>3</b> .                                             | 12   |
| S21. | IR spectrum of compound <b>3</b> .                                                  | 13   |
| S22. | $^1\text{H}$ NMR spectrum (600 MHz) of compound <b>3</b> in $\text{CDCl}_3$ .       | 13   |
| S23. | $^{13}\text{C}$ NMR spectrum (150 MHz) of compound <b>3</b> in $\text{CDCl}_3$ .    | 14   |
| S24. | HSQC spectrum of compound <b>3</b> in $\text{CDCl}_3$ .                             | 15   |
| S25. | $^1\text{H}$ – $^1\text{H}$ COSY spectrum of compound <b>2</b> in $\text{CDCl}_3$ . | 15   |
| S26. | HMBC spectrum of compound <b>3</b> in $\text{CDCl}_3$ .                             | 16   |
| S27. | NOESY spectrum of compound <b>3</b> in $\text{CDCl}_3$ .                            | 16   |

## FT-MS

**Analysis Info**  
 Analysis Name: D:\Data\2\WB0723\_000007.d  
 Method: broadband first signal  
 Sample Name: WB-0-72-3  
 Comment: ESI Positive  
 5/31/2019 2:57:16 PM  
 Instrument: FT-MS solarix

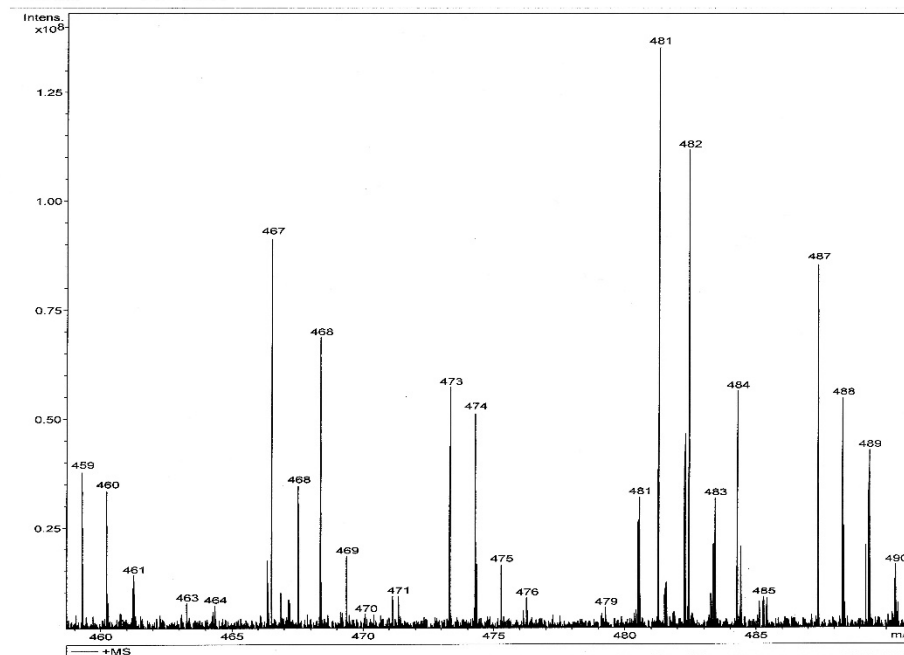

Bruker Compass DataAnalysis 4.0  
 printed: 5/31/2019 2:57:16 PM  
 Page 1 of 1

S1. ESIMS spectrum of compound 1.

## Mass Spectrum SmartFormula Report

**Analysis Info**  
 Analysis Name: D:\Data\2\WB0723\_000008.d  
 Method: broadband first signal  
 Sample Name: WB-0-72-3  
 Comment: ESI Positive  
 5/31/2019 2:56:06 PM  
 Operator: YU HSIAO-CHING  
 Instrument: BRUKER FT-MS solarix

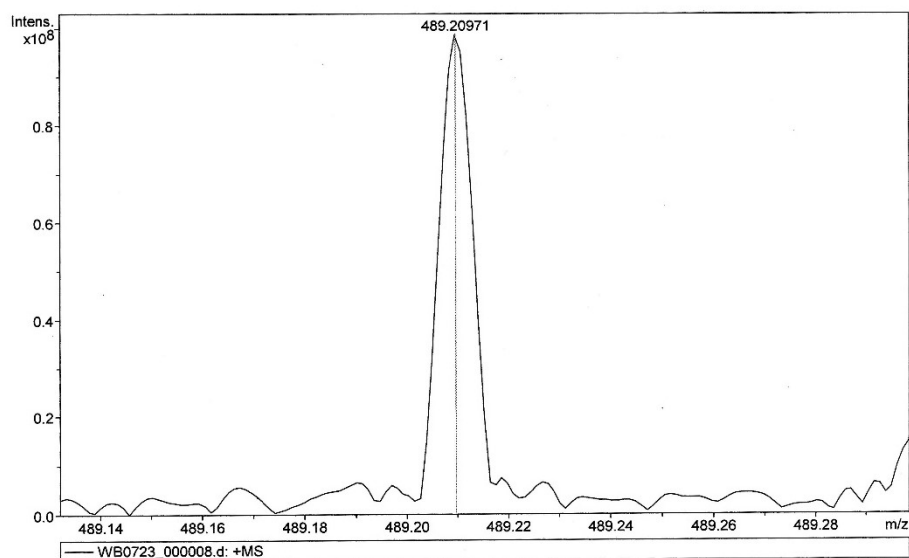

| Meas. m/z | # | Formula                                          | Score  | m/z       | err [mDa] | err [ppm] | mSigma | rdb | e <sup>-</sup> Conf | N-Rule |
|-----------|---|--------------------------------------------------|--------|-----------|-----------|-----------|--------|-----|---------------------|--------|
| 489.20971 | 1 | C <sub>24</sub> H <sub>34</sub> NaO <sub>9</sub> | 100.00 | 489.20950 | -0.20     | -0.42     | 26.5   | 7.5 | even                | ok     |

S2. HRESIMS spectrum of compound 1.

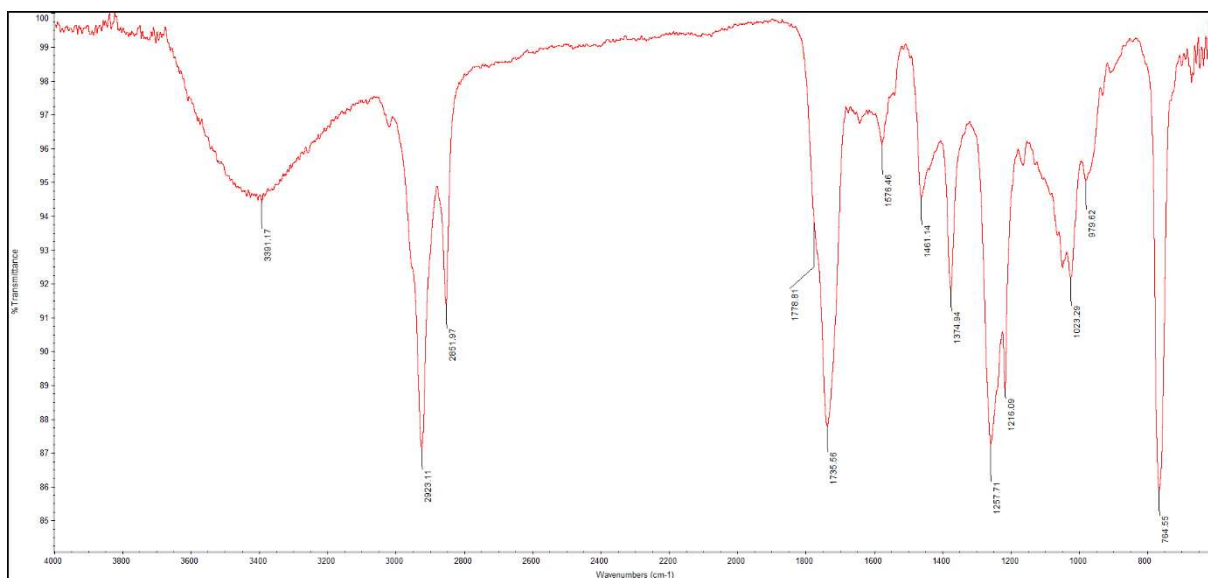

S3. IR spectrum of compound **1**.

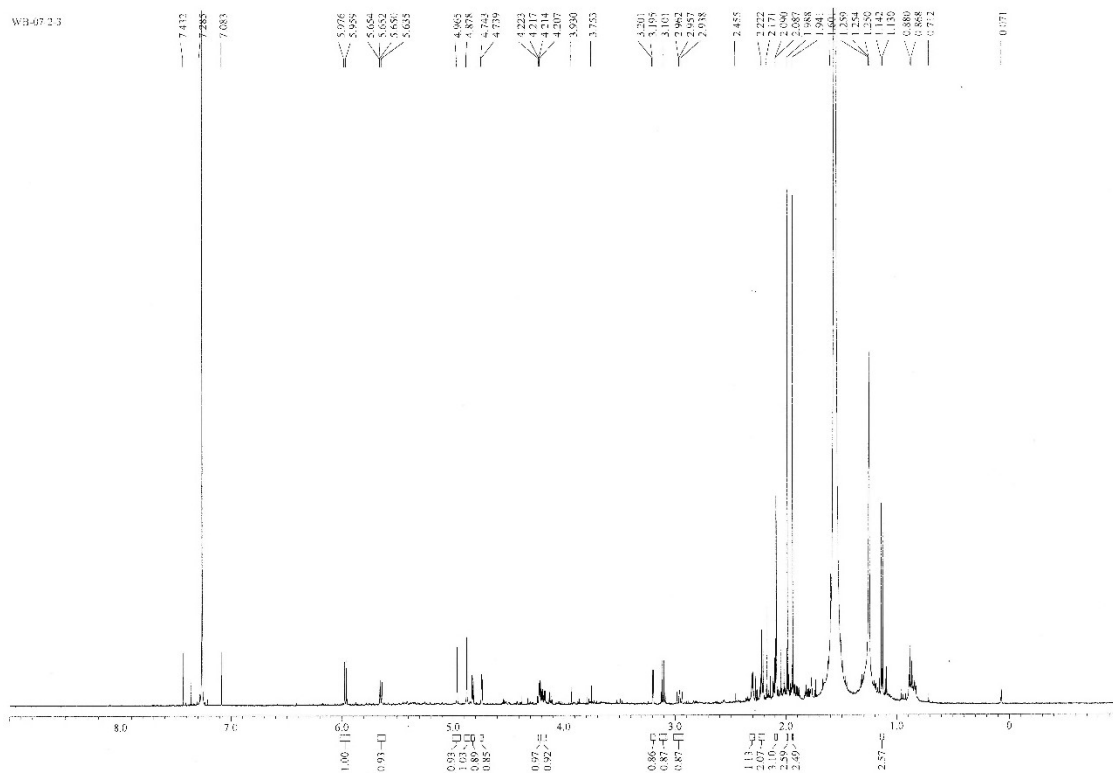

S4. <sup>1</sup>H NMR spectrum (600 MHz) of compound **1** in CDCl<sub>3</sub>.

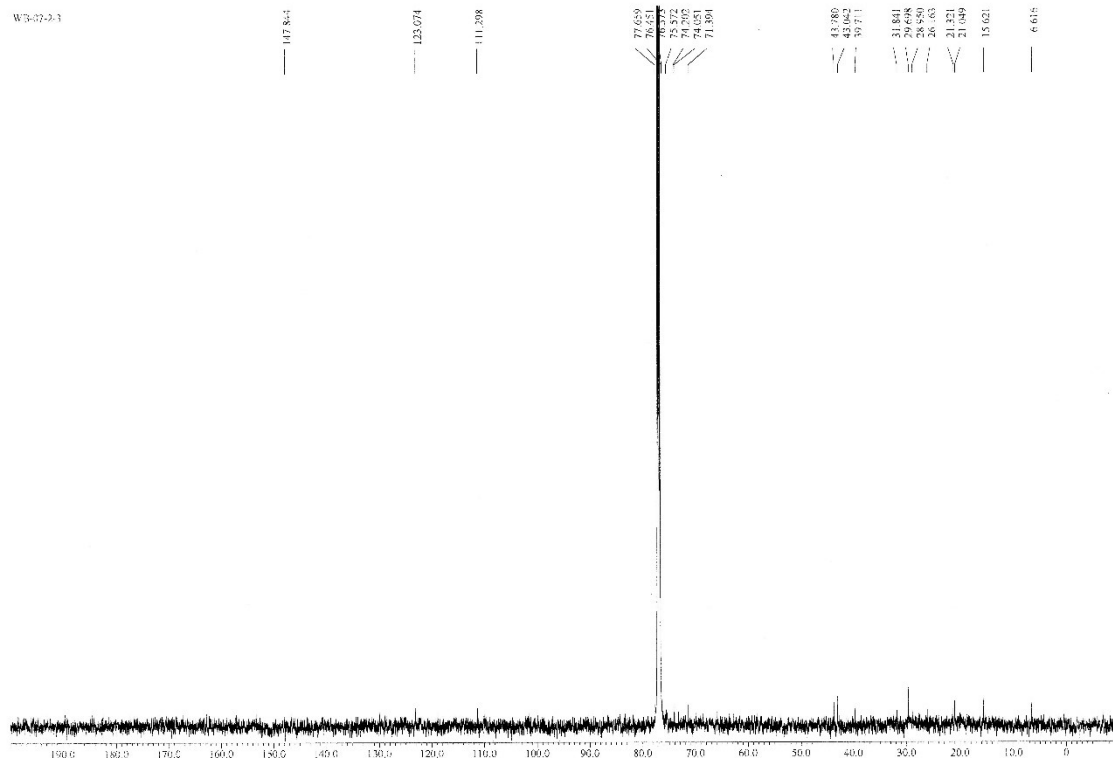

S5.  $^{13}\text{C}$  NMR spectrum (150 MHz) of compound **1** in  $\text{CDCl}_3$ .

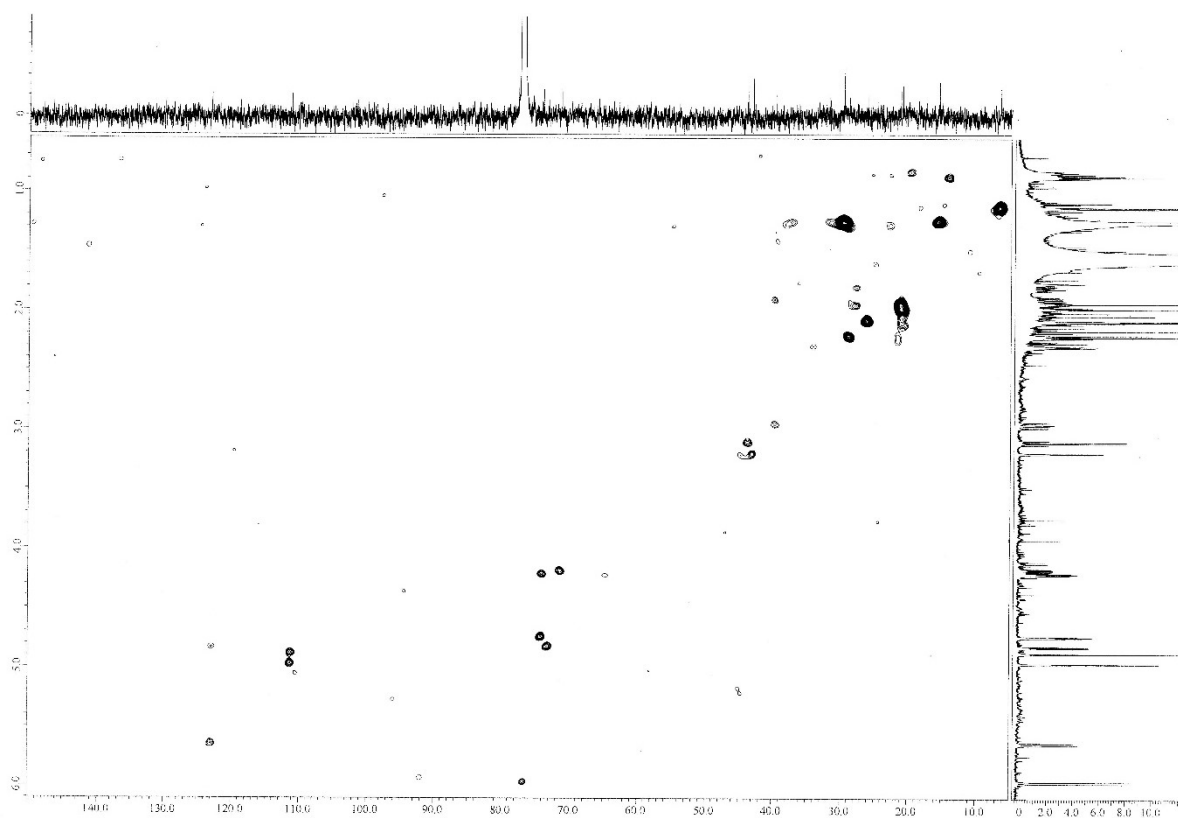

S6. HSQC spectrum of compound **1** in  $\text{CDCl}_3$ .

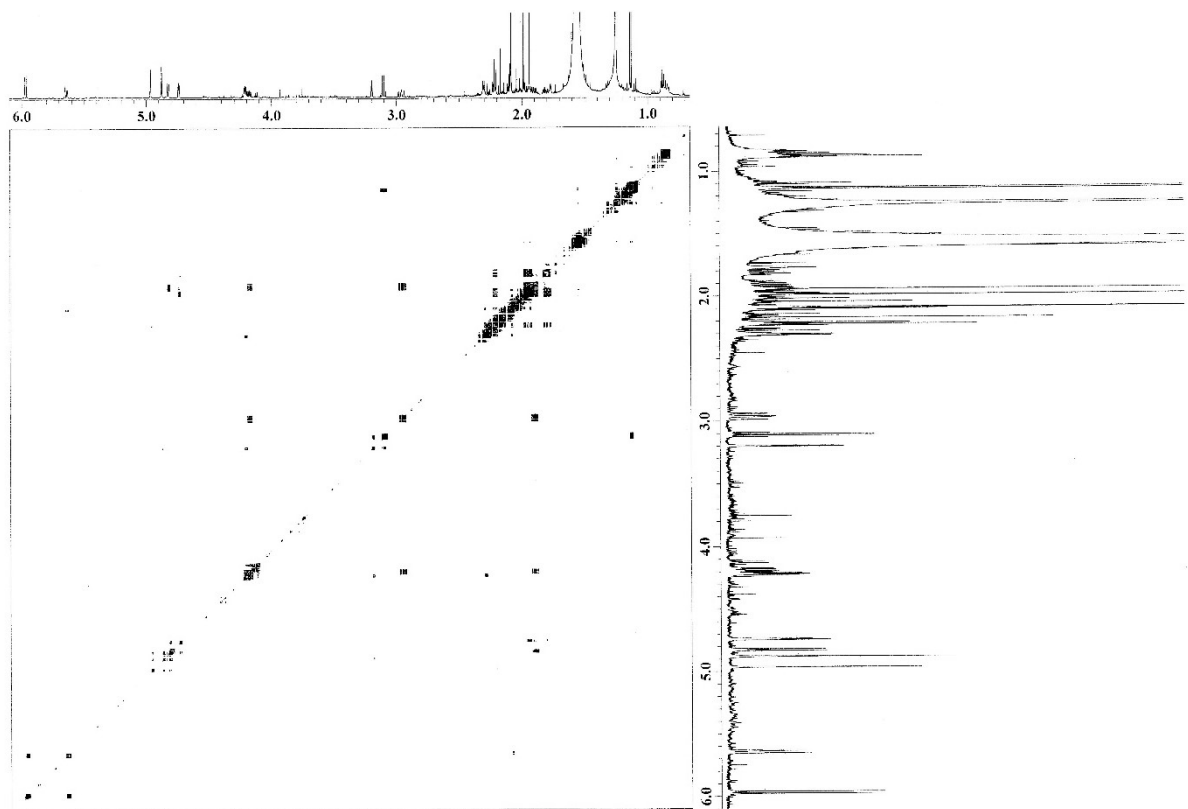

S7.  $^1\text{H}$ – $^1\text{H}$  COSY spectrum of compound **1** in  $\text{CDCl}_3$ .

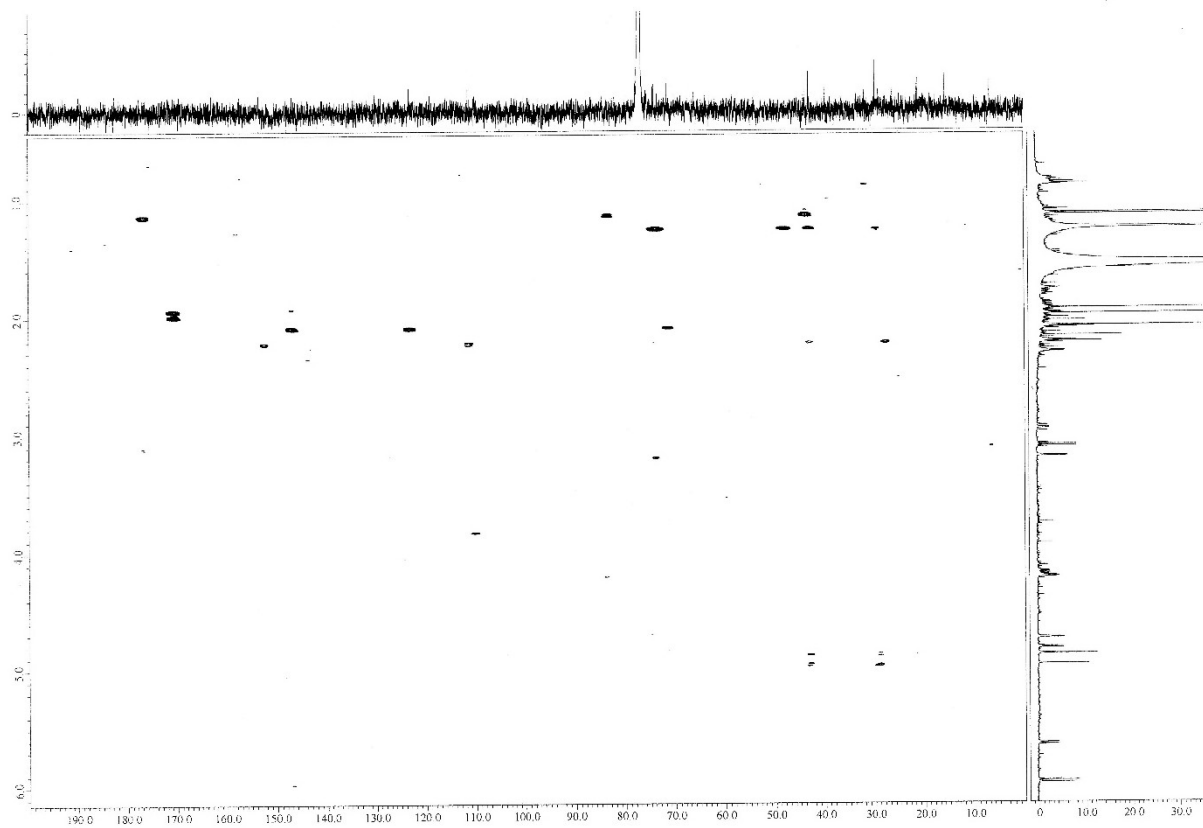

S8. HMBC spectrum of compound **1** in  $\text{CDCl}_3$ .

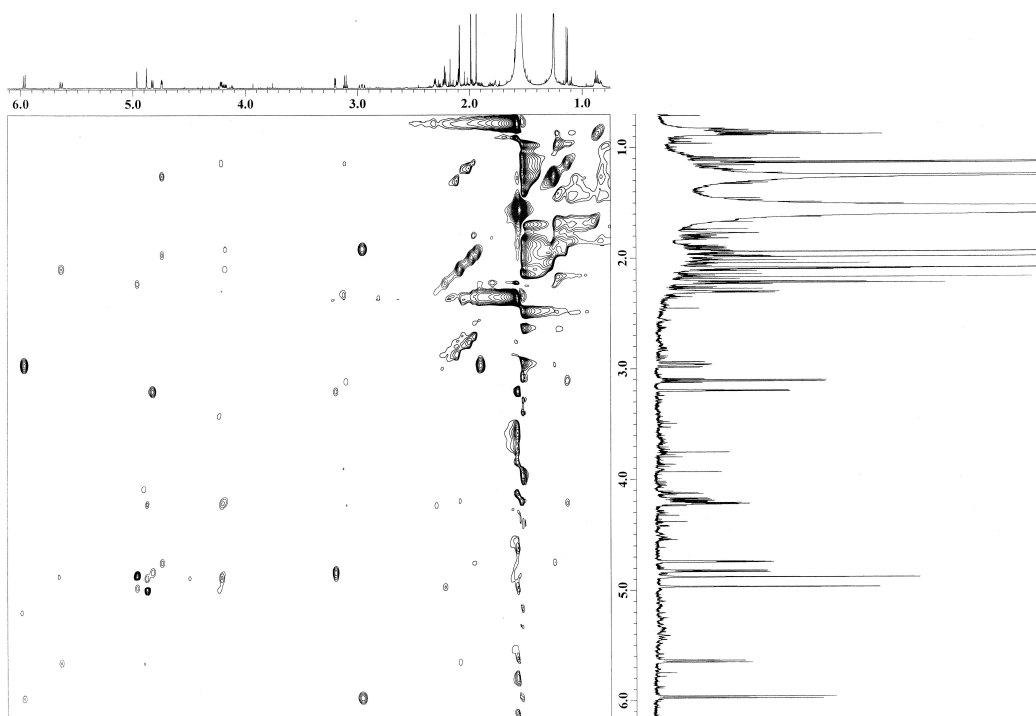

S9. NOESY spectrum of compound **1** in  $\text{CDCl}_3$ .

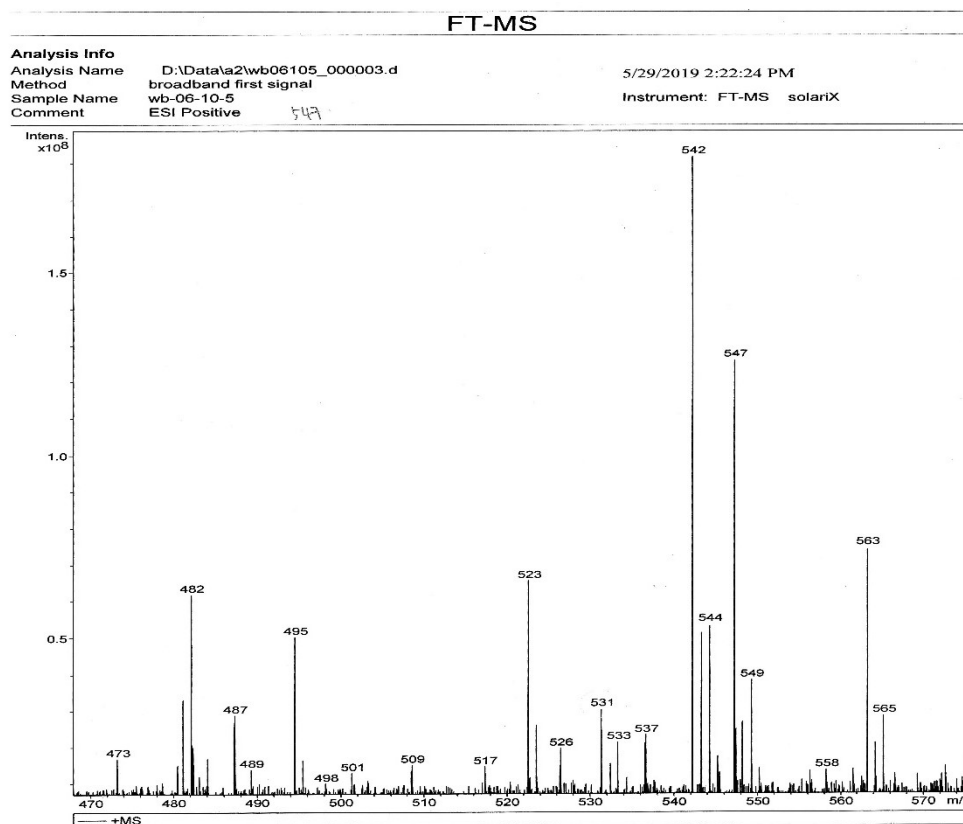

S10. ESIMS spectrum of compound **2**.

## Mass Spectrum SmartFormula Report

### Analysis Info

Analysis Name D:\Data\2\wb06105\_000005.d  
Method broadband first signal  
Sample Name wb-06-10-5  
Comment ESI Positive

6/12/2019 4:13:22 PM  
Operator: YU HSIAO-CHING  
Instrument: BRUKER FT-MS solarix

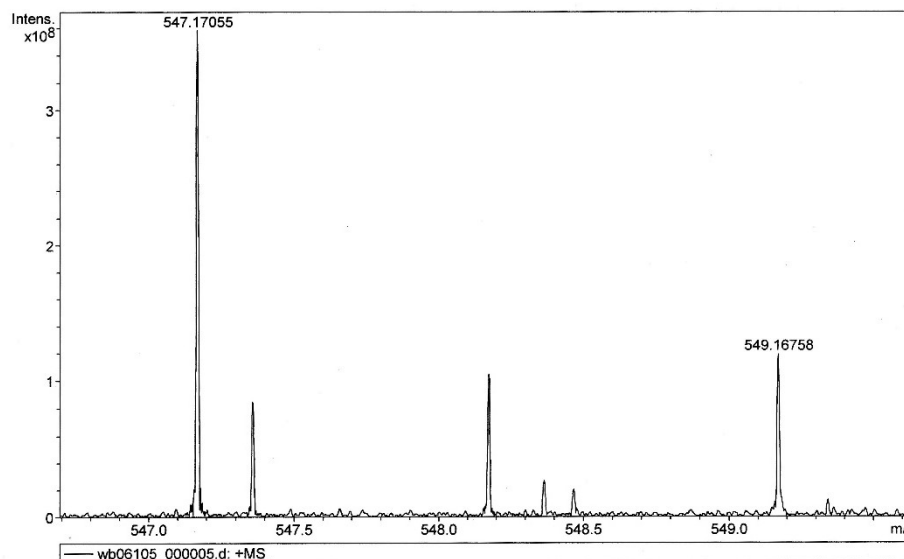

| Meas. m/z | # | Formula                                            | Score  | m/z       | err [mDa] | err [ppm] | mSigma | rdb | e <sup>-</sup> | Conf | N-Rule |
|-----------|---|----------------------------------------------------|--------|-----------|-----------|-----------|--------|-----|----------------|------|--------|
| 547.17055 | 1 | C <sub>26</sub> H <sub>33</sub> ClNaO <sub>9</sub> | 100.00 | 547.17053 | -0.02     | -0.03     | 22.1   | 9.5 | even           |      | ok     |

S11. HRESIMS spectrum of compound 2.

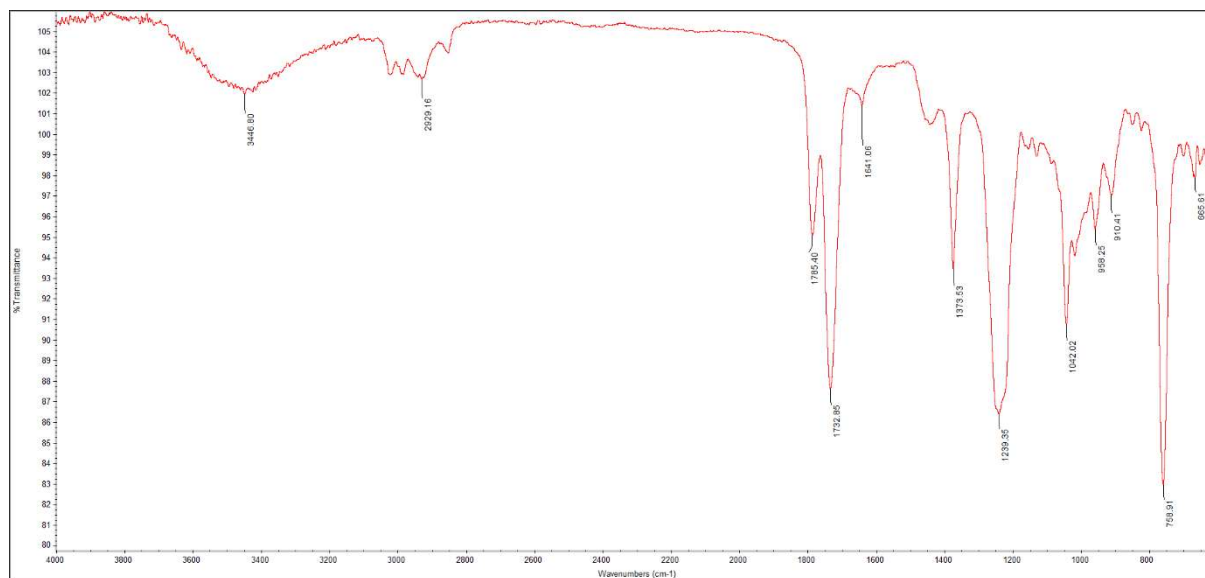

S12. IR spectrum of compound 2.

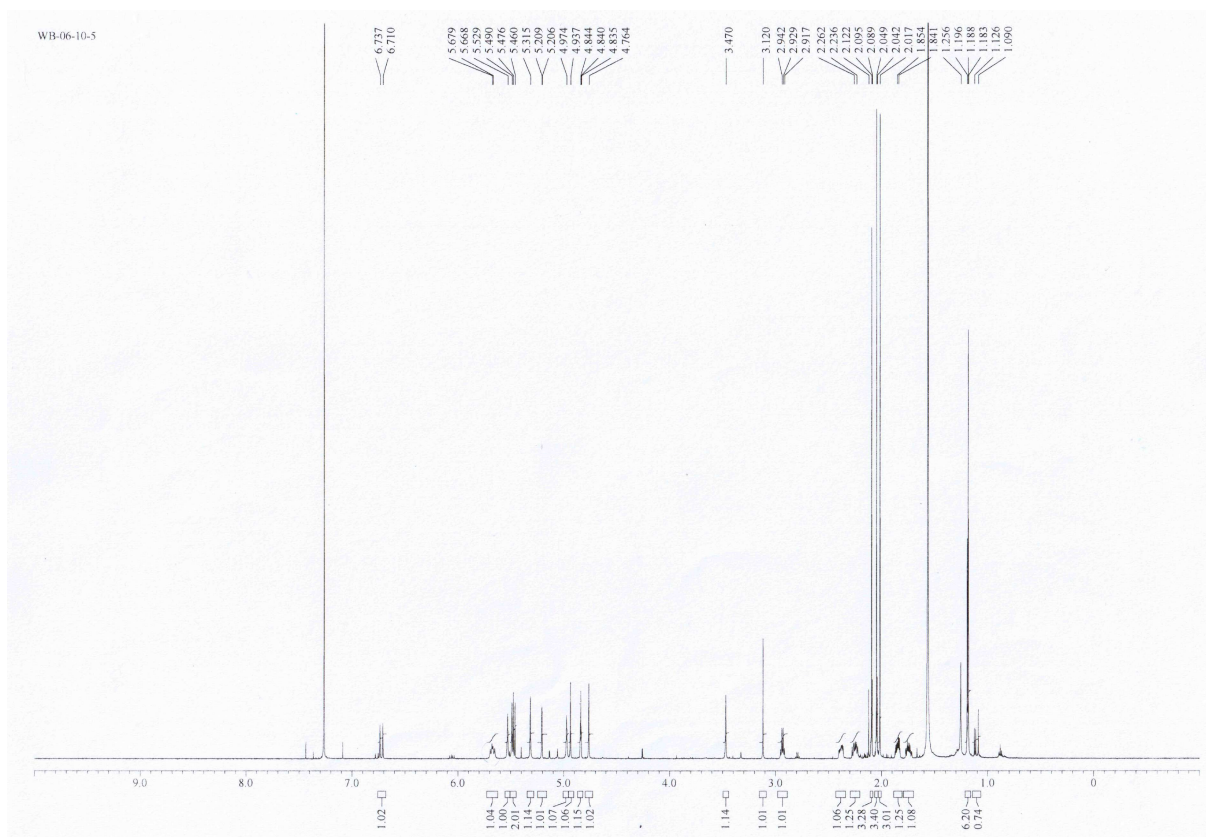

S13.  $^1\text{H}$  NMR spectrum (600 MHz) of compound **2** in  $\text{CDCl}_3$ .

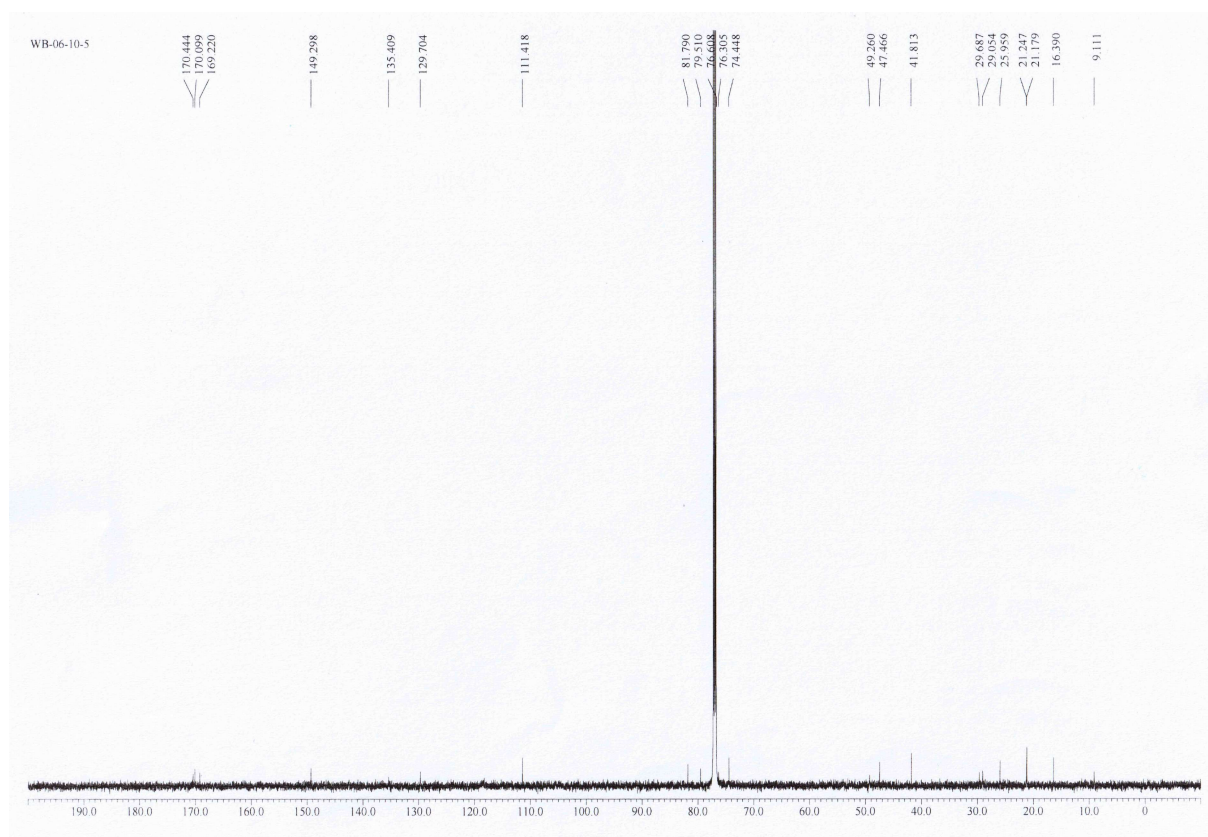

S14.  $^{13}\text{C}$  NMR spectrum (150 MHz) of compound **2** in  $\text{CDCl}_3$ .

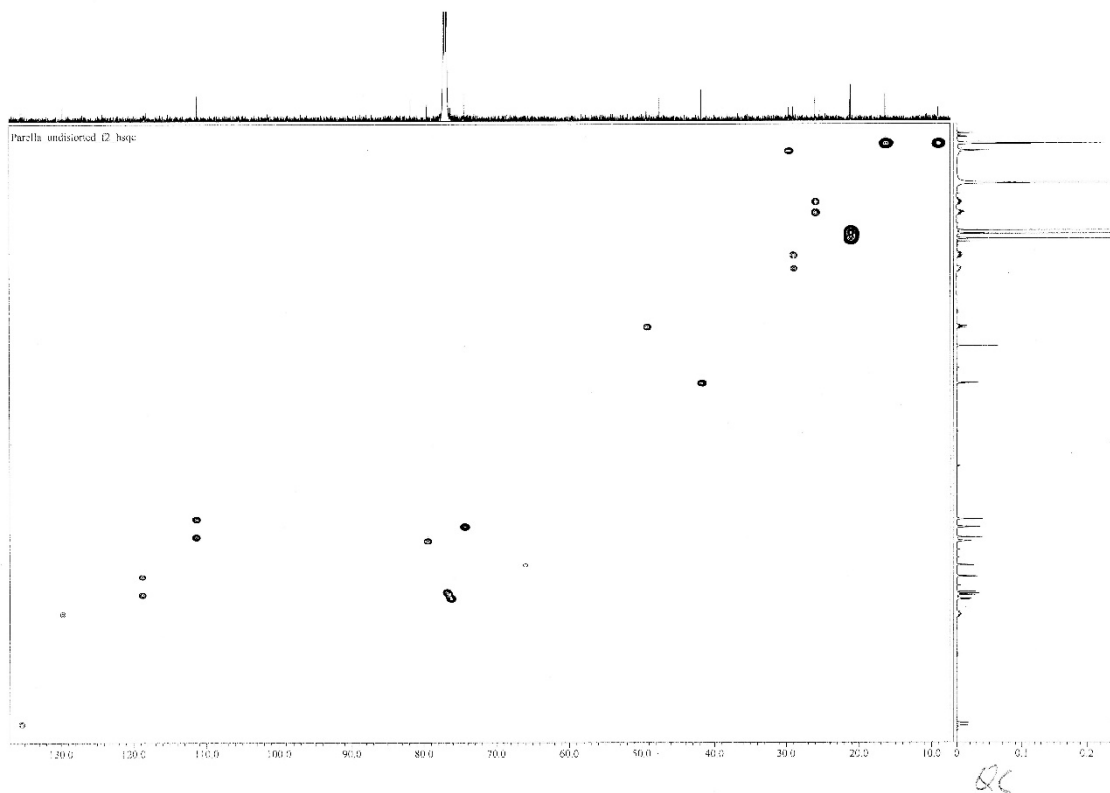

S15. HSQC spectrum of compound **2** in CDCl<sub>3</sub>.

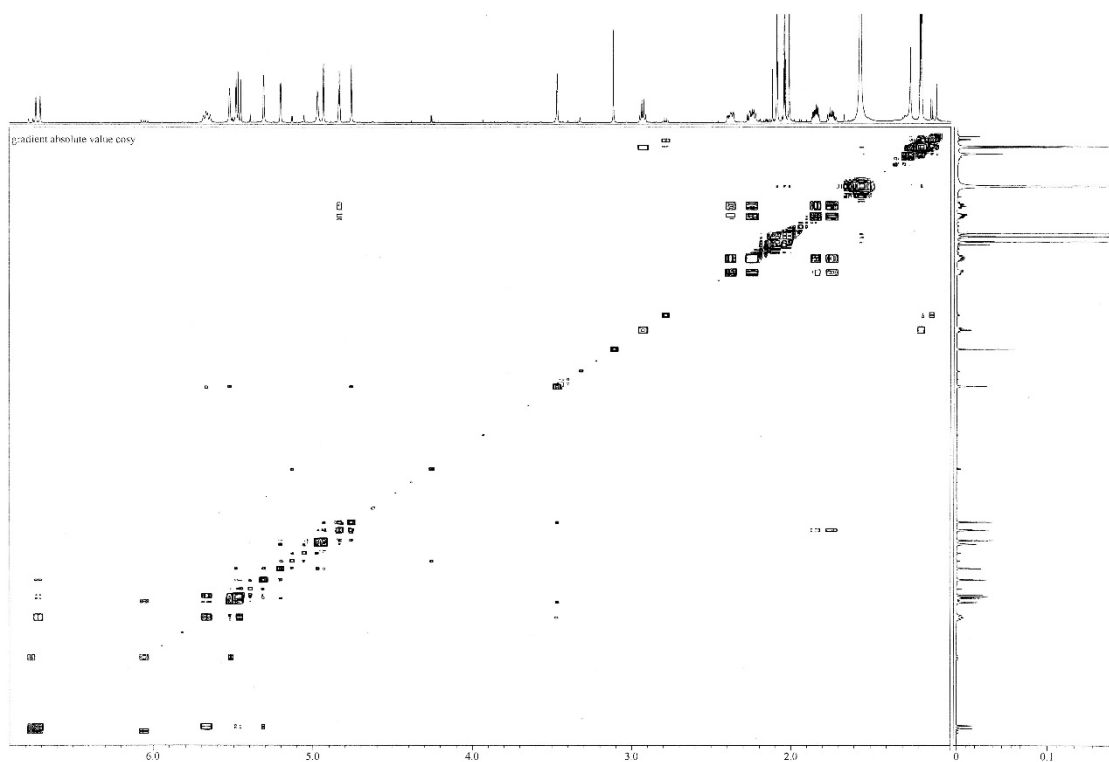

S16. <sup>1</sup>H-<sup>1</sup>H COSY spectrum of compound **2** in CDCl<sub>3</sub>.

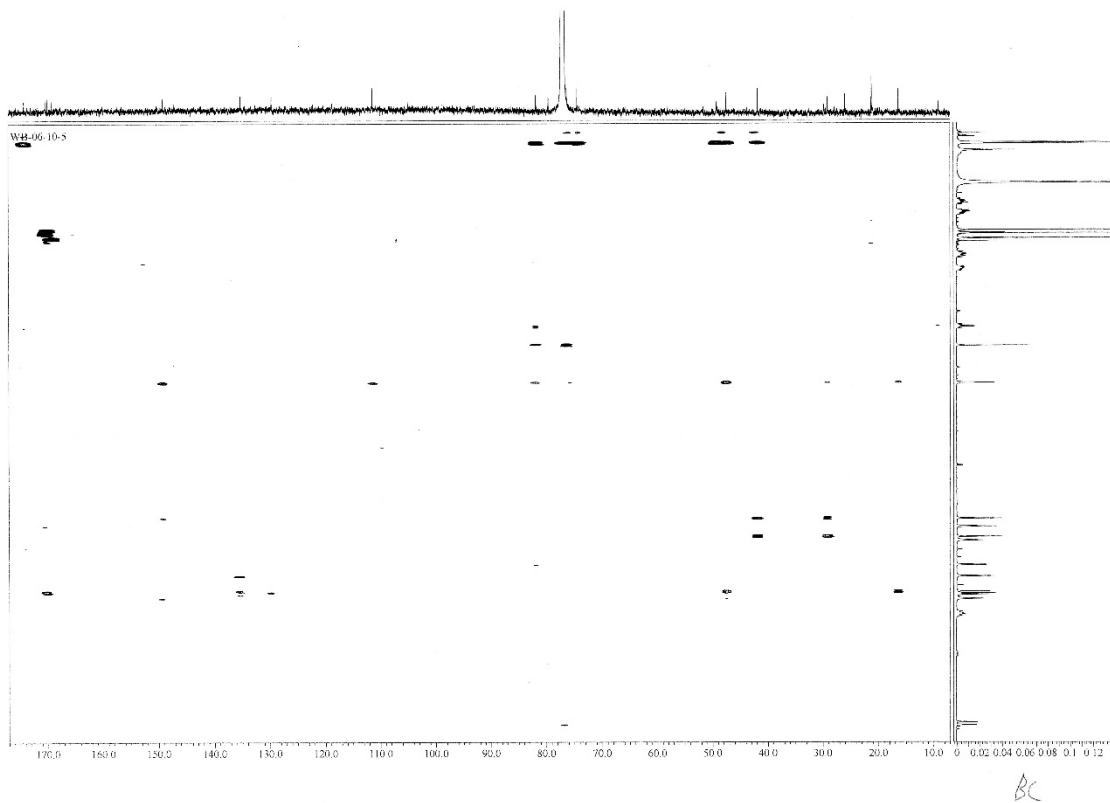

S17. HMBC spectrum of compound **2** in  $\text{CDCl}_3$ .

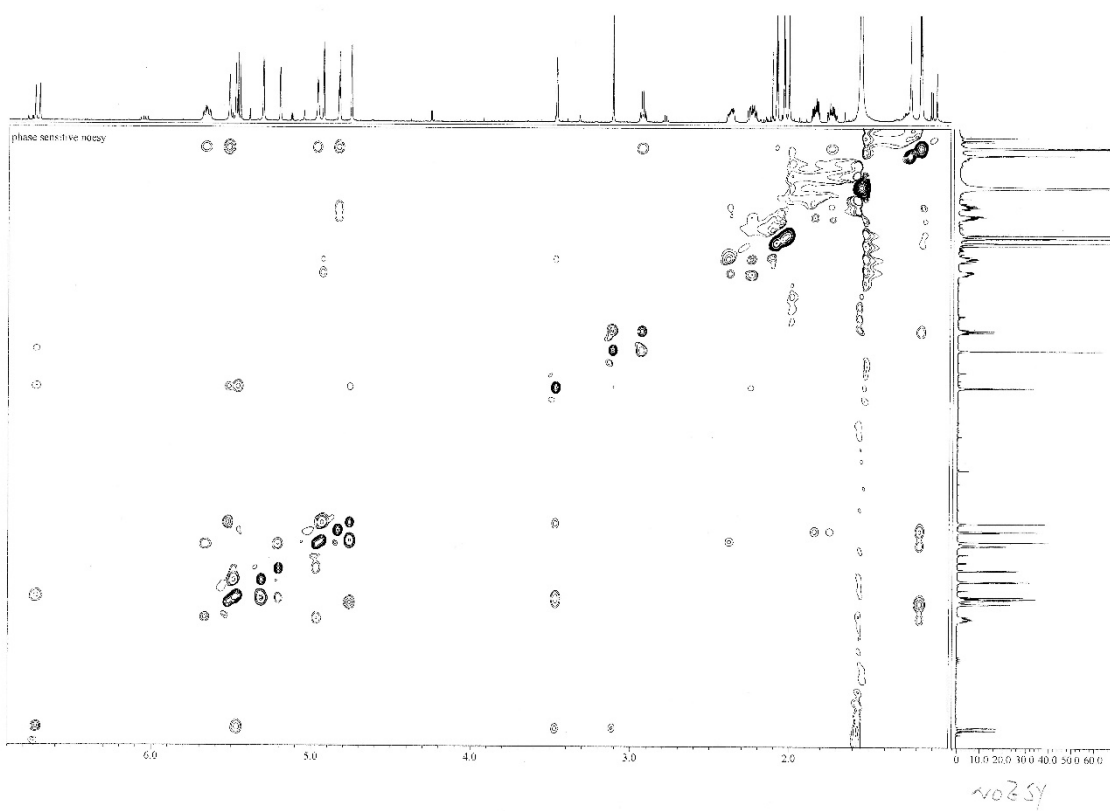

S18. NOESY spectrum of compound **2** in  $\text{CDCl}_3$ .

# FT-MS

## Analysis Info

Analysis Name D:\Data\2\wb061011\_000003.d  
Method broadband first signal  
Sample Name wb-06-10-11  
Comment ESI Positive

5/29/2019 2:53:40 PM

Instrument: FT-MS solarix

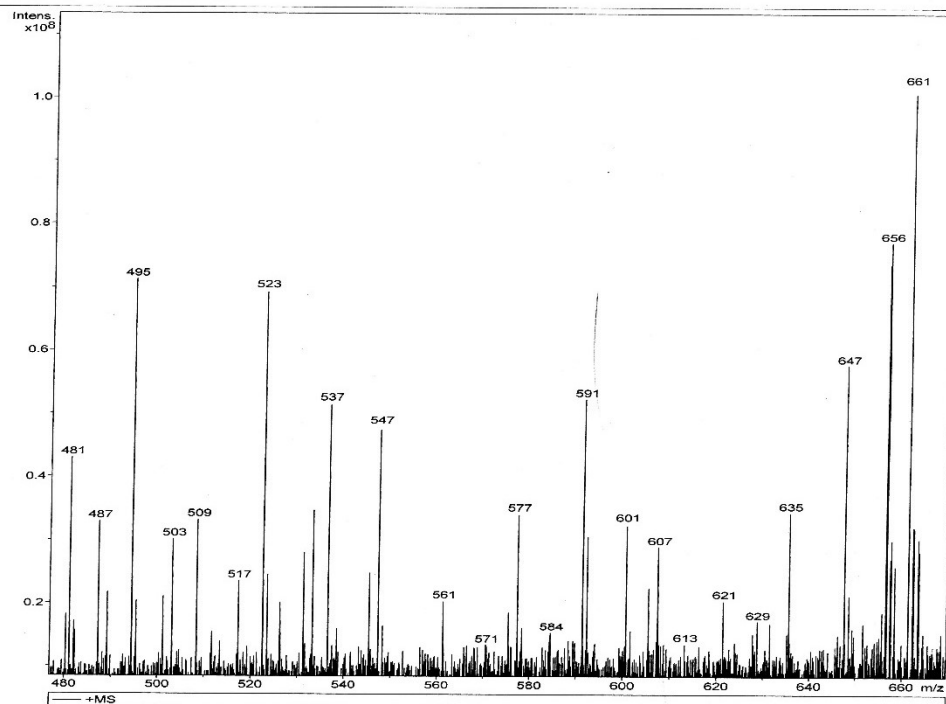

S19. ESIMS spectrum of compound 3.

## Mass Spectrum SmartFormula Report

### Analysis Info

Analysis Name D:\Data\2\wb061011\_000005.d  
Method broadband first signal  
Sample Name wb-06-10-11  
Comment ESI Positive

5/29/2019 2:52:59 PM

Operator: YU HSIAO-CHING

Instrument: BRUKER FT-MS solarix

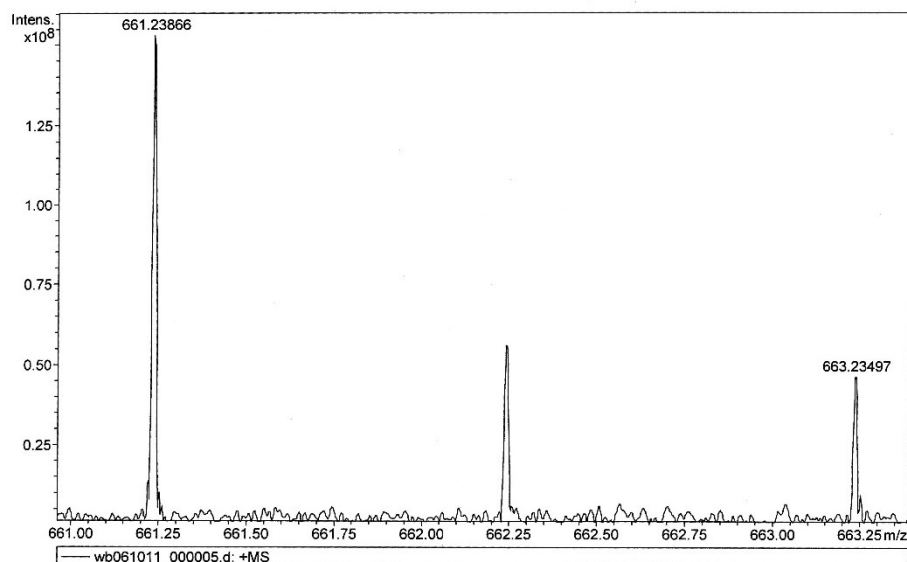

| Meas. m/z | # | Formula                                             | Score  | m/z       | err [mDa] | err [ppm] | mSigma | rdb  | e <sup>-</sup> | Conf | N-Rule |
|-----------|---|-----------------------------------------------------|--------|-----------|-----------|-----------|--------|------|----------------|------|--------|
| 661.23866 | 1 | C <sub>32</sub> H <sub>43</sub> ClNaO <sub>11</sub> | 100.00 | 661.23861 | -0.05     | -0.07     | 45.2   | 10.5 | even           |      | ok     |

S20. HRESIMS spectrum of compound 3.

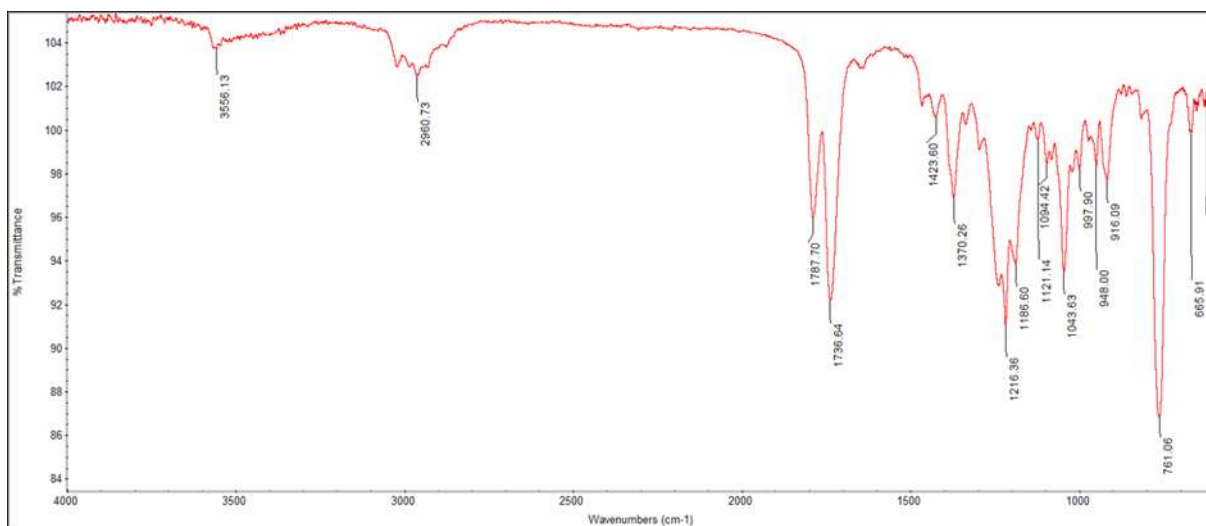

S21. IR spectrum of compound **3**.

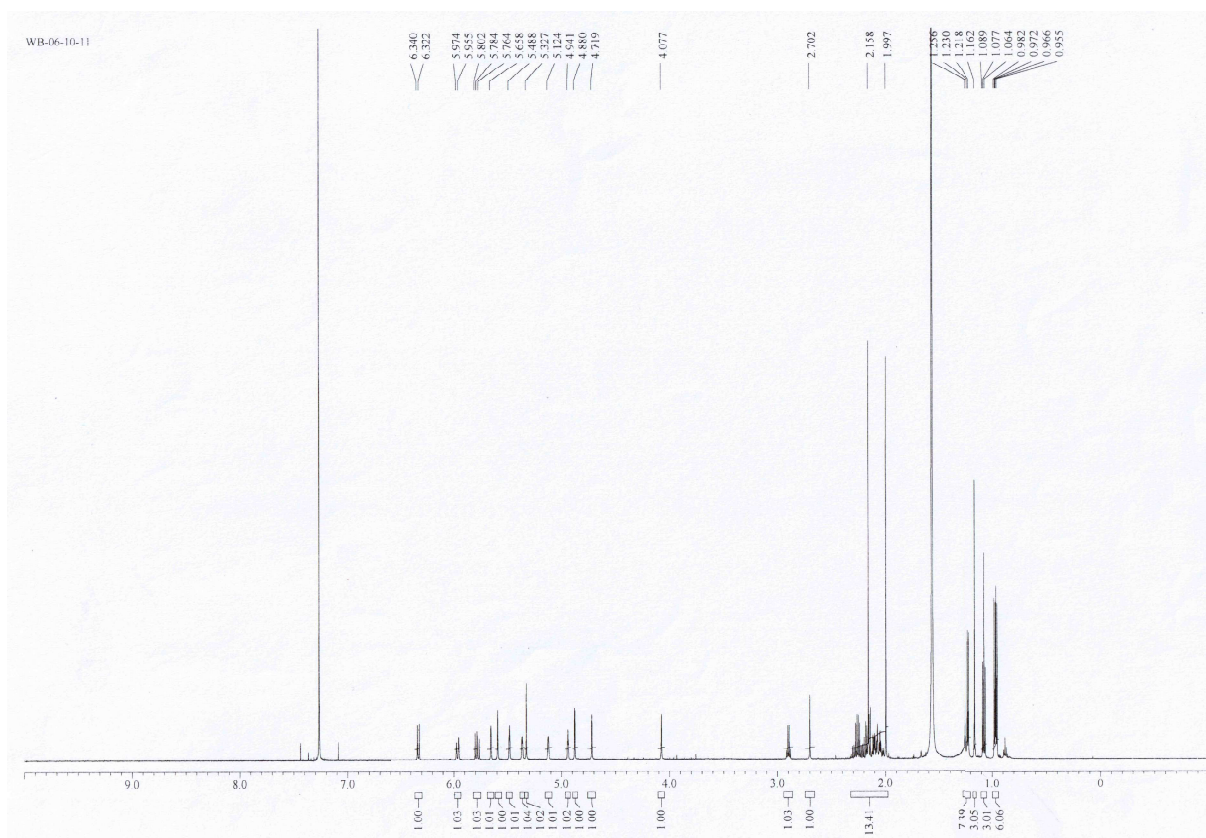

S22. <sup>1</sup>H NMR spectrum (600 MHz) of compound **3** in CDCl<sub>3</sub>.

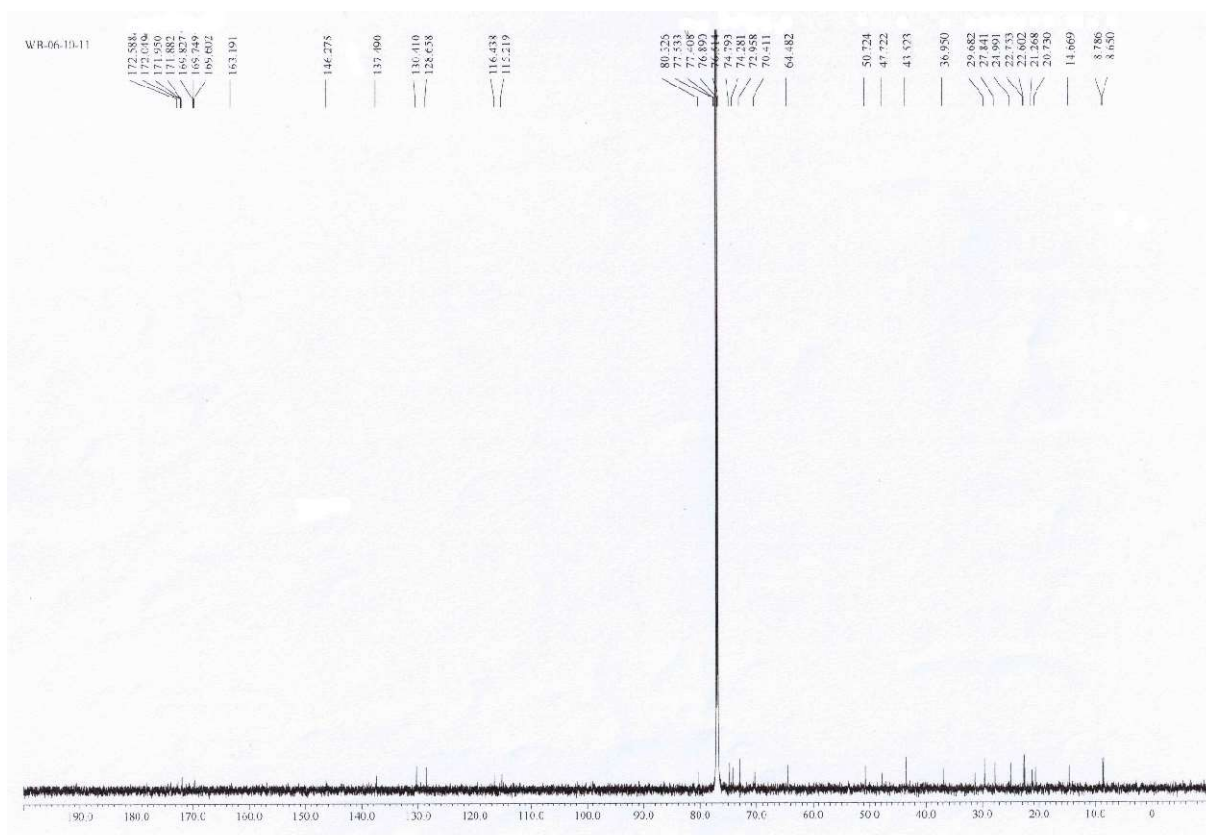

S23.  $^{13}\text{C}$  NMR spectrum (150 MHz) of compound **3** in  $\text{CDCl}_3$ .

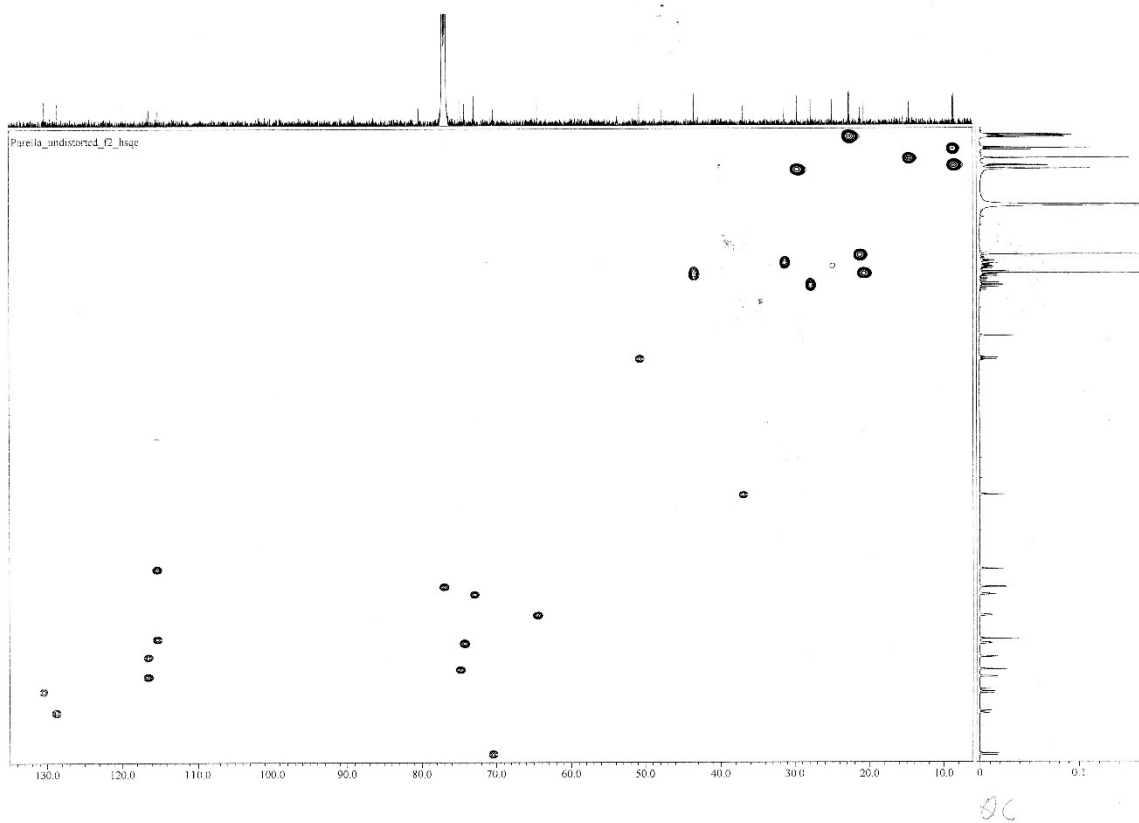

S24. HSQC spectrum of compound **3** in CDCl<sub>3</sub>.

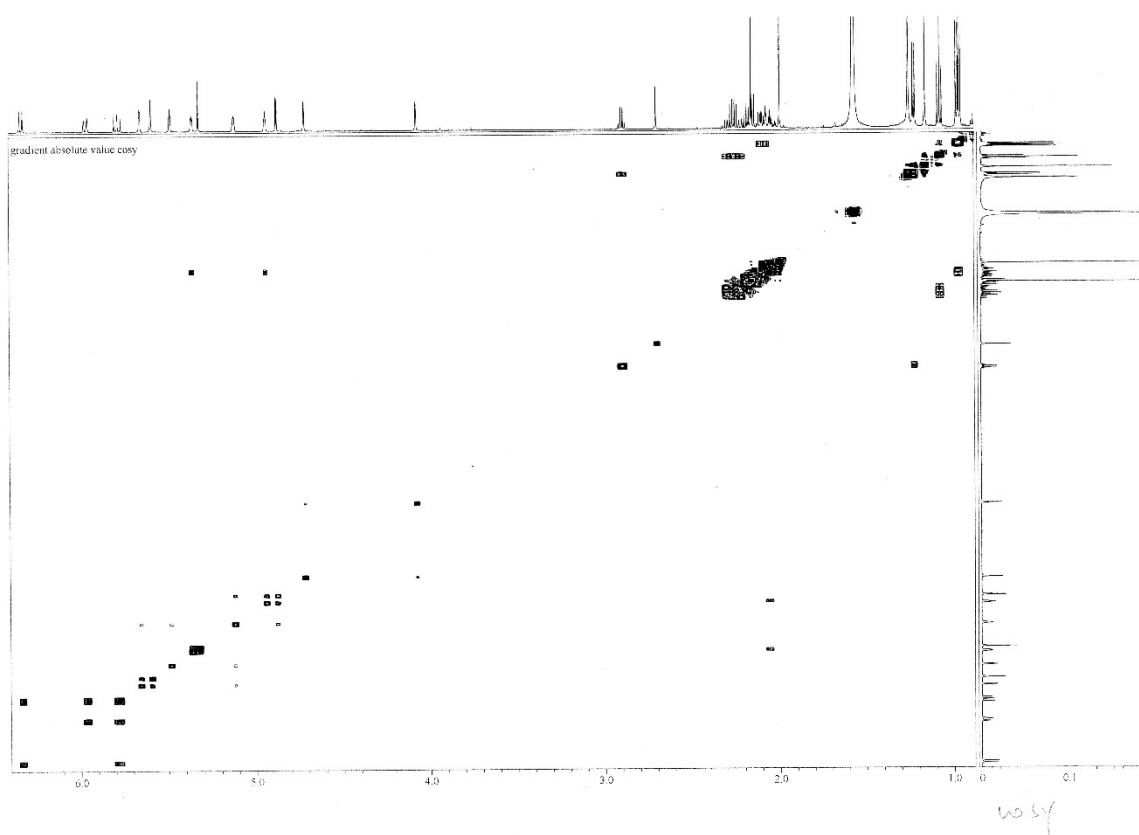

S25. <sup>1</sup>H-<sup>1</sup>H COSY spectrum of compound **3** in CDCl<sub>3</sub>.

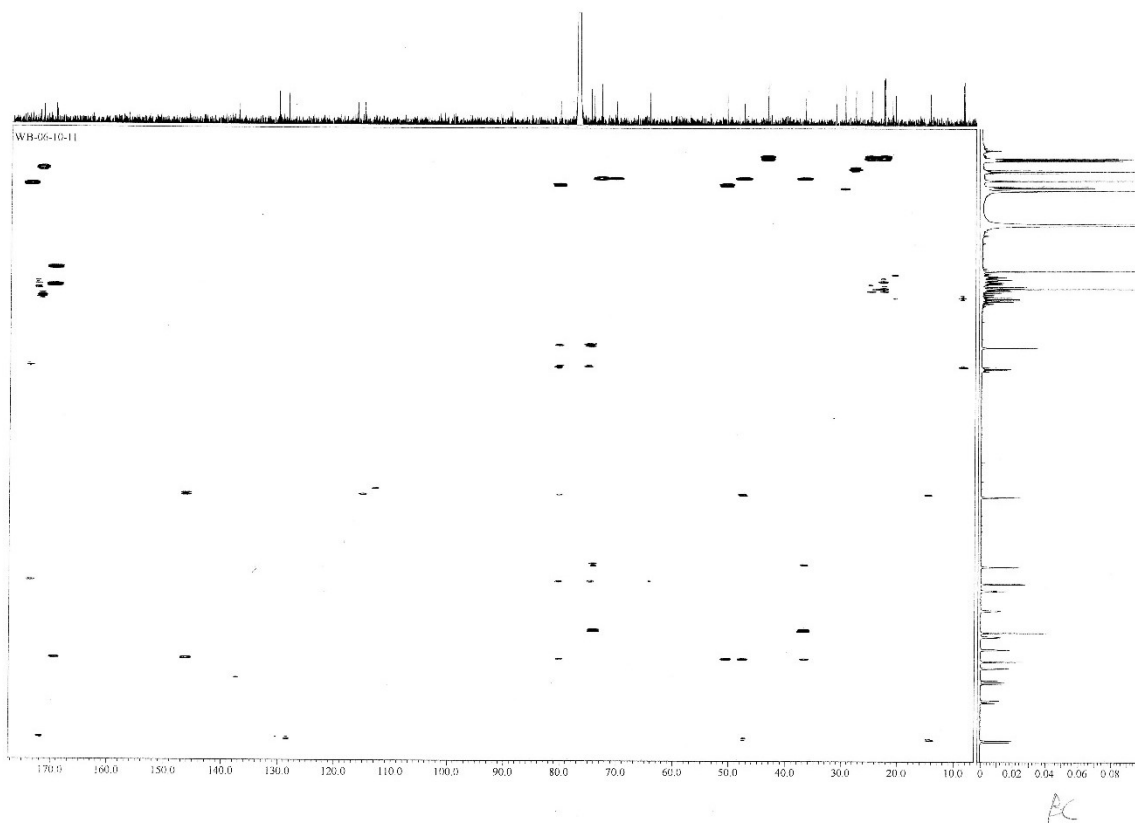

S26. HMBC spectrum of compound **3** in  $\text{CDCl}_3$ .

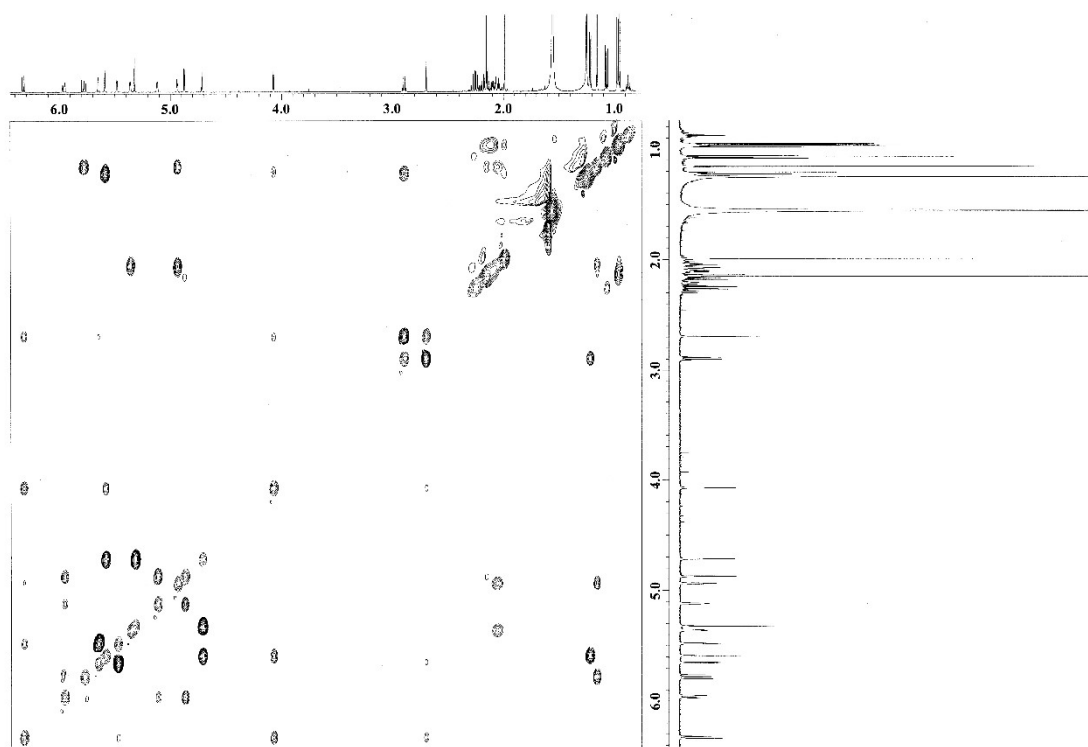

S27. NOESY spectrum of compound **3** in  $\text{CDCl}_3$ .
